# Supplementary material for: TLR3 agonist and Sorafenib combinatorial therapy promotes immune activation and controls hepatocellular carcinoma progression
Source: PubMed Central journal article supplement (PMC4694987; doi:10.18632/oncotarget.4583), 2015-07-23
Supplement: oncotarget-06-27252-s001.pdf [file oncotarget-06-27252-s001.pdf]

## SUPPLEMENTARY TABLE AND FIGURES

### Reagents and antibodies

The list of antibodies used in immunohistochemistry (IHC), flow cytometry (FC) and western blotting (WB) was listed in Supplementary Table S1 below. The working dilutions are 1:50 for all antibodies.

**Supplementary Table S1: List of antibodies**

| Antibody      | Host    | Clone       | Company and location         | Application |
|---------------|---------|-------------|------------------------------|-------------|
| CD279 (PD-1)  | Rat     | RMP1-30     | BD Biosciences, San Jose, CA | FC          |
| CD274 (PDL-1) | Rat     | MIH5        | BD Biosciences, San Jose, CA | FC          |
| CD80          | Hamster | 16-10A1     | BD Biosciences, San Jose, CA | FC          |
| CD40          | Rat     | 3/23        | BD Biosciences, San Jose, CA | FC          |
| CD197 (CCR7)  | Rat     | 4B12        | eBiosciences, San Diego, CA  | FC          |
| CD69          | Hamster | H1.2F3      | Biolegend, San Diego, CA     | FC          |
| CD45          | Rat     | 30-F11      | Invitrogen, Carlsbad, CA     | FC          |
| CD3           | Rat     | RM4-5       | eBiosciences, San Diego, CA  | FC          |
| CD8           | Rat     | 5H10        | Invitrogen, Carlsbad, CA     | FC          |
| CD4           | Rat     | GK1.5       | Biolegend, San Diego, CA     | FC          |
| NK1.1         | Mouse   | PK136       | BD Biosciences, San Jose, CA | FC          |
| CD11b         | Rat     | M1/70       | eBiosciences, San Diego, CA  | FC          |
| CD11c         | Hamster | N418        | Biolegend, San Diego, CA     | FC          |
| Gr1           | Rat     | RB6-8C5     | Biolegend, San Diego, CA     | FC          |
| I-A/I-E       | Rat     | M5/114.15.2 | BD Biosciences, San Jose, CA | FC          |
| F4/80         | Rat     | BM8         | eBiosciences, San Diego, CA  | FC          |

(Continued)

| Antibody                            | Host    | Clone      | Company and location                     | Application |
|-------------------------------------|---------|------------|------------------------------------------|-------------|
| CD3                                 | Rat     | KT3        | Acris Antibodies GmbH, Herford, Germany. | IHC         |
| Granzyme B                          | Goat    | Polyclonal | R&D Systems, Inc.                        | IHC         |
| Phospho-AKT (Ser 473)               | Rabbit  | D9E        | Cell Signaling Technology, Danvers, MA   | WB          |
| Phospho-p44/42 MAPK (Thr202/Tyr204) | Rabbit  | D13.14.4E  | Cell Signaling Technology, Danvers, MA   | WB          |
| Phospho-MEK1/2 (Ser217/221)         | Rabbit  | Polyclonal | Cell Signaling Technology, Danvers, MA   | WB          |
| Pan AKT                             | Mouse   | 40D4       | Cell Signaling Technology, Danvers, MA   | WB          |
| p44/42 MAPK                         | Mouse   | L34F12     | Cell Signaling Technology, Danvers, MA   | WB          |
| MEK 1/2                             | Mouse   | L38C12     | Cell Signaling Technology, Danvers, MA   | WB          |
| GAPDH                               | Chicken | Polyclonal | Millipore, Billerica, MA                 | WB          |

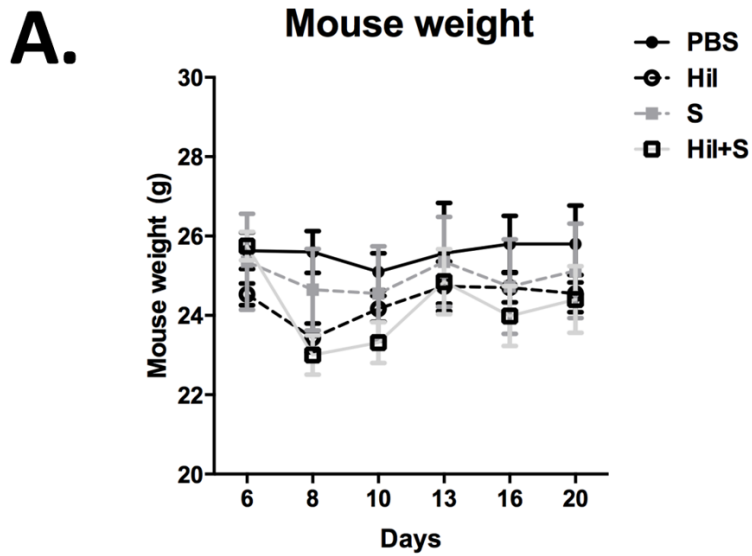

**Supplementary Figure S1: Low toxicity shown in mice treated with combinatorial treatment.** C57BL/6 mice were transplanted with Hepa 1-6 cells in each flank and treated with either PBS, poly-ICLC (pIC), Sorafenib (S) or combination of both (pIC+S) as indicated in Figure 2C. **A.** An initial loss of body weight was noted in mice that were treated with either pIC or pIC+S, but  $p = ns$  (not significant). (Continued)

**B.**

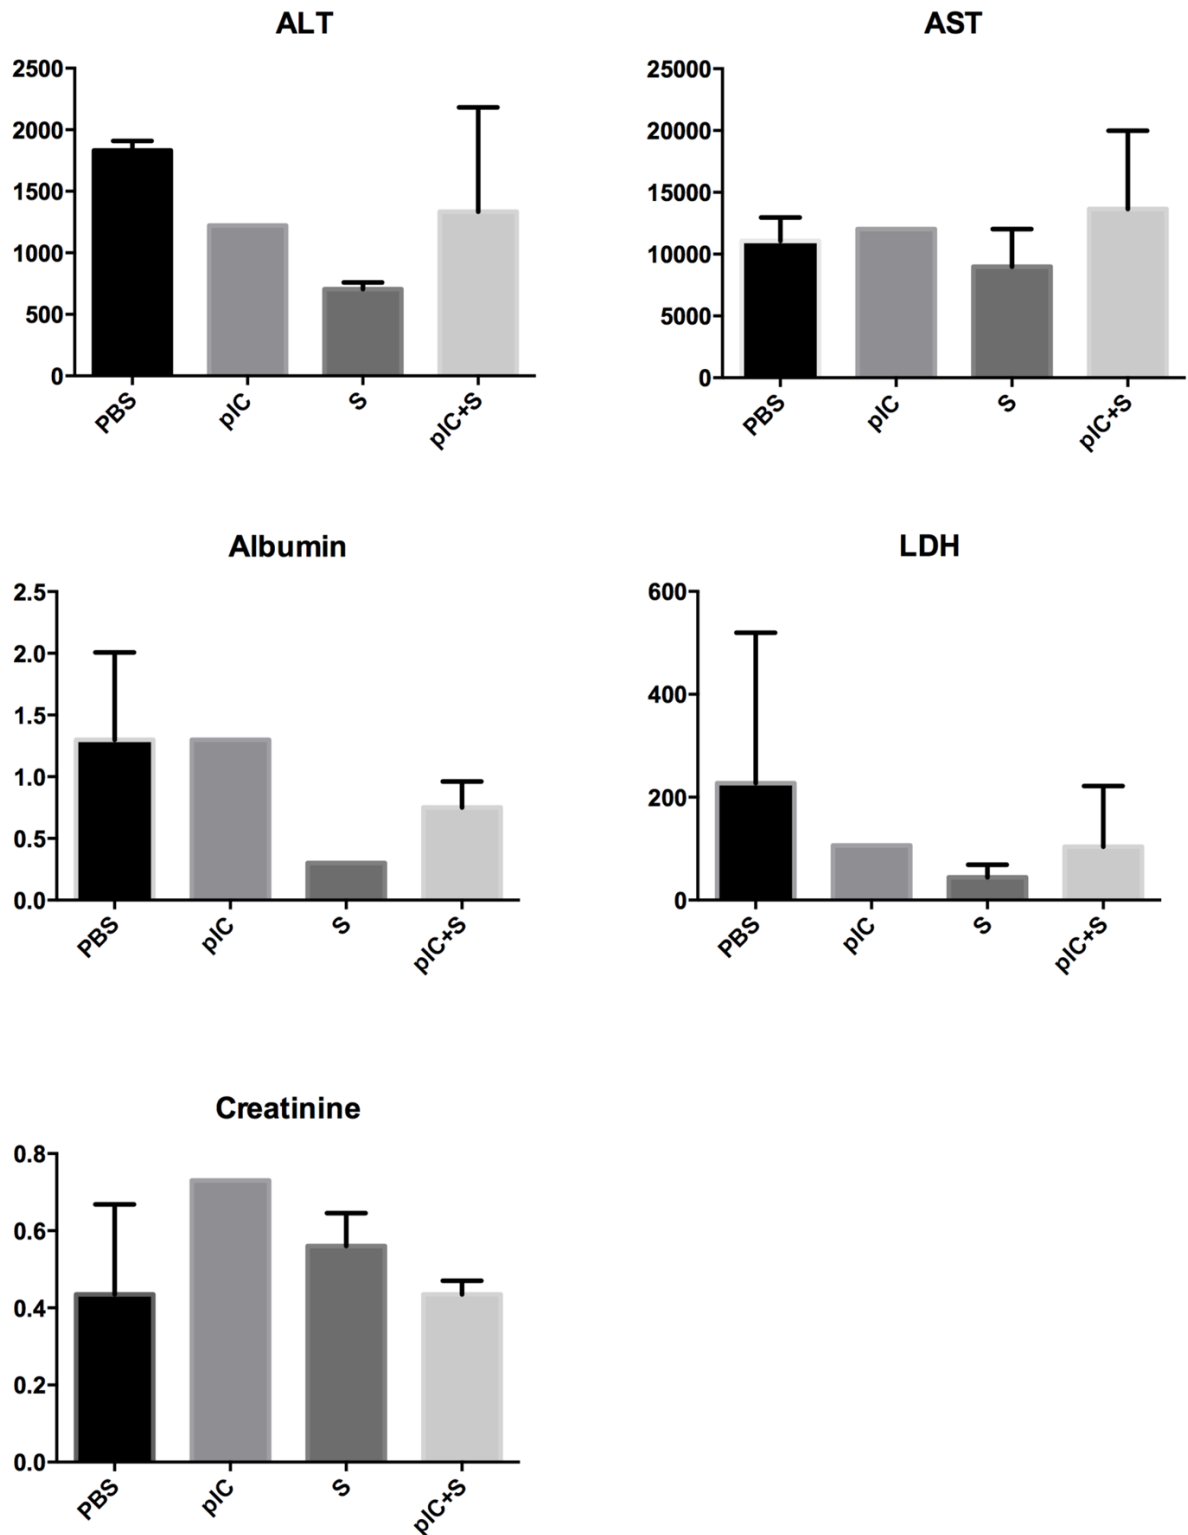

Supplementary Figure S1: (Continued) Low toxicity shown in mice treated with combinatorial treatment. **B.** Serum level of ALT, AST, Albumin, LDH and Creatinine were comparable among all treatment groups One-way ANOVA test with post Tukey's multiple comparisons test.

A.

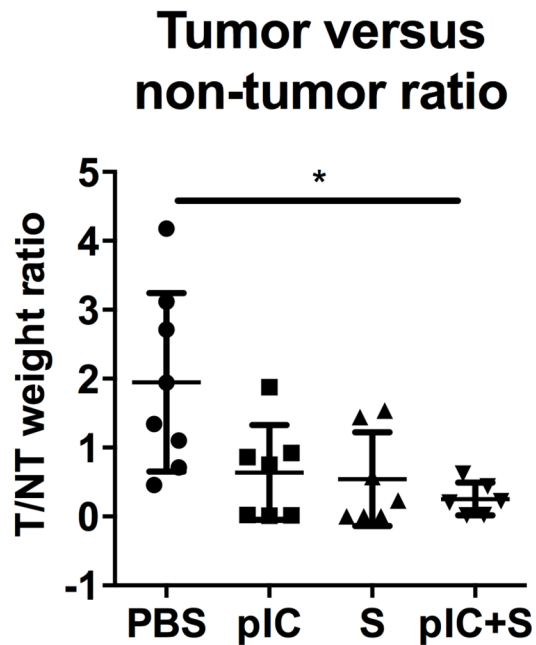

B.

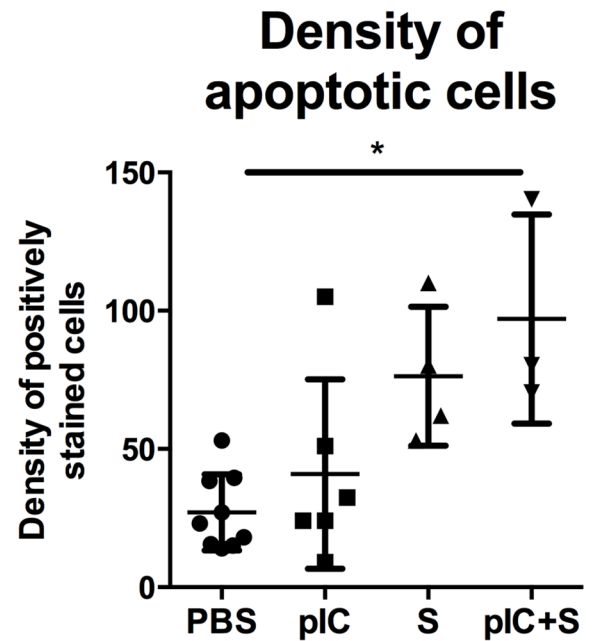

**Supplementary Figure S2: Enhanced tumor control by combinatorial treatment in spontaneous model of liver tumors.** C57BL/6 mice were induced to develop liver tumors spontaneously and treated as indicated in Figure 1D. **A.** Decreased mass ratio of liver tumor to healthy liver tissue (g) as harvested from mice treated with pIC+S at week 4.  $n = 6-9$  from each treatment group. **B.** Increased density of apoptotic cells (TUNEL assay) was indicated by the increase in mean numbers of positively stained cells per tumor field from mice treated with pIC+S.  $n = 4-10$ . Mean and SD were shown.  $*p < 0.05$ , One-way ANOVA test with post Tukey's multiple comparisons test.

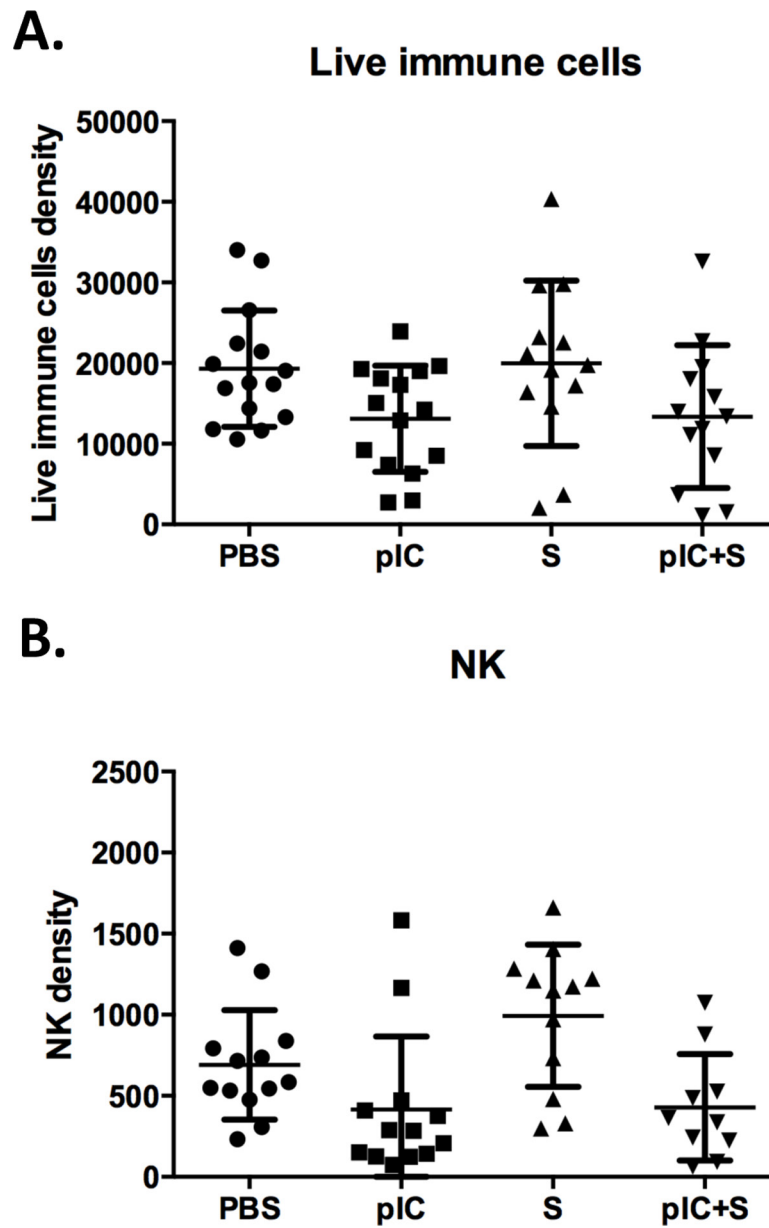

**Supplementary Figure S3: No change in the density of TIL with combinatorial treatment in treated mice.** C57BL/6 mice were transplanted with Hepa 1-6 cells in each flank and treated with either PBS, poly-ICLC (pIC), Sorafenib (S) or combination of both (pIC+S) as indicated in Figure 2C. Tumor-infiltrating leukocytes (TIL) were isolated and analysed using flow cytometry. Comparable densities of **A.** CD45<sup>+</sup>DAPI<sup>-</sup> live immune cells **B.** CD45<sup>+</sup>NK1.1<sup>+</sup>CD3<sup>-</sup>DAPI<sup>-</sup> NK cells. (*Continued*)

C.

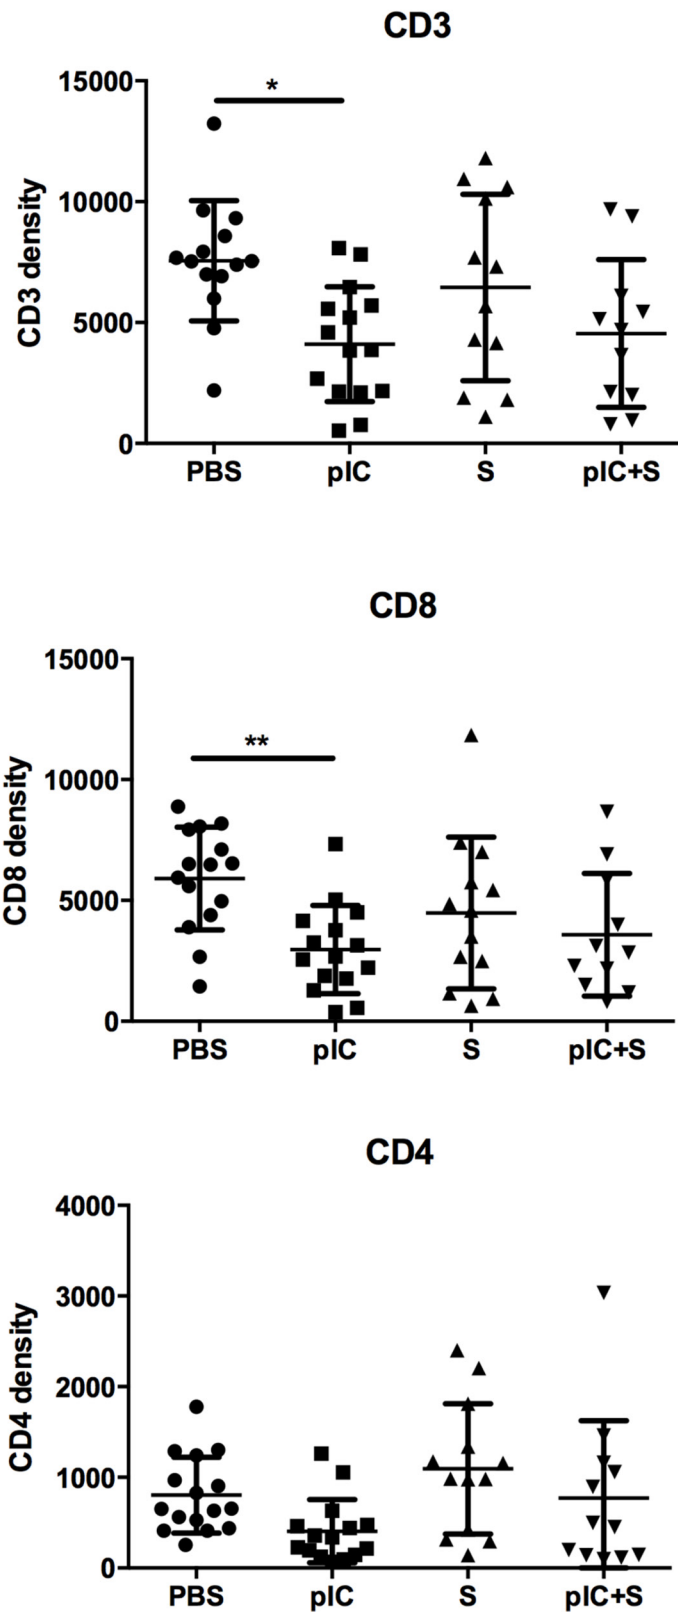

Supplementary Figure S3: (Continued) No change in the density of TIL with combinatorial treatment in treated mice. C. CD45<sup>+</sup>DAPI<sup>-</sup>CD3<sup>+</sup>/CD4<sup>+</sup>/CD8<sup>+</sup> T cells per mg of tumor weight from mice treated with pIC+S versus other treatments.  $n = 13-15$  tumors. A-C. Mean and SD were shown. \* $p < 0.05$ ; \*\* $p < 0.01$ , One-way ANOVA test with post Tukey's multiple comparisons test.

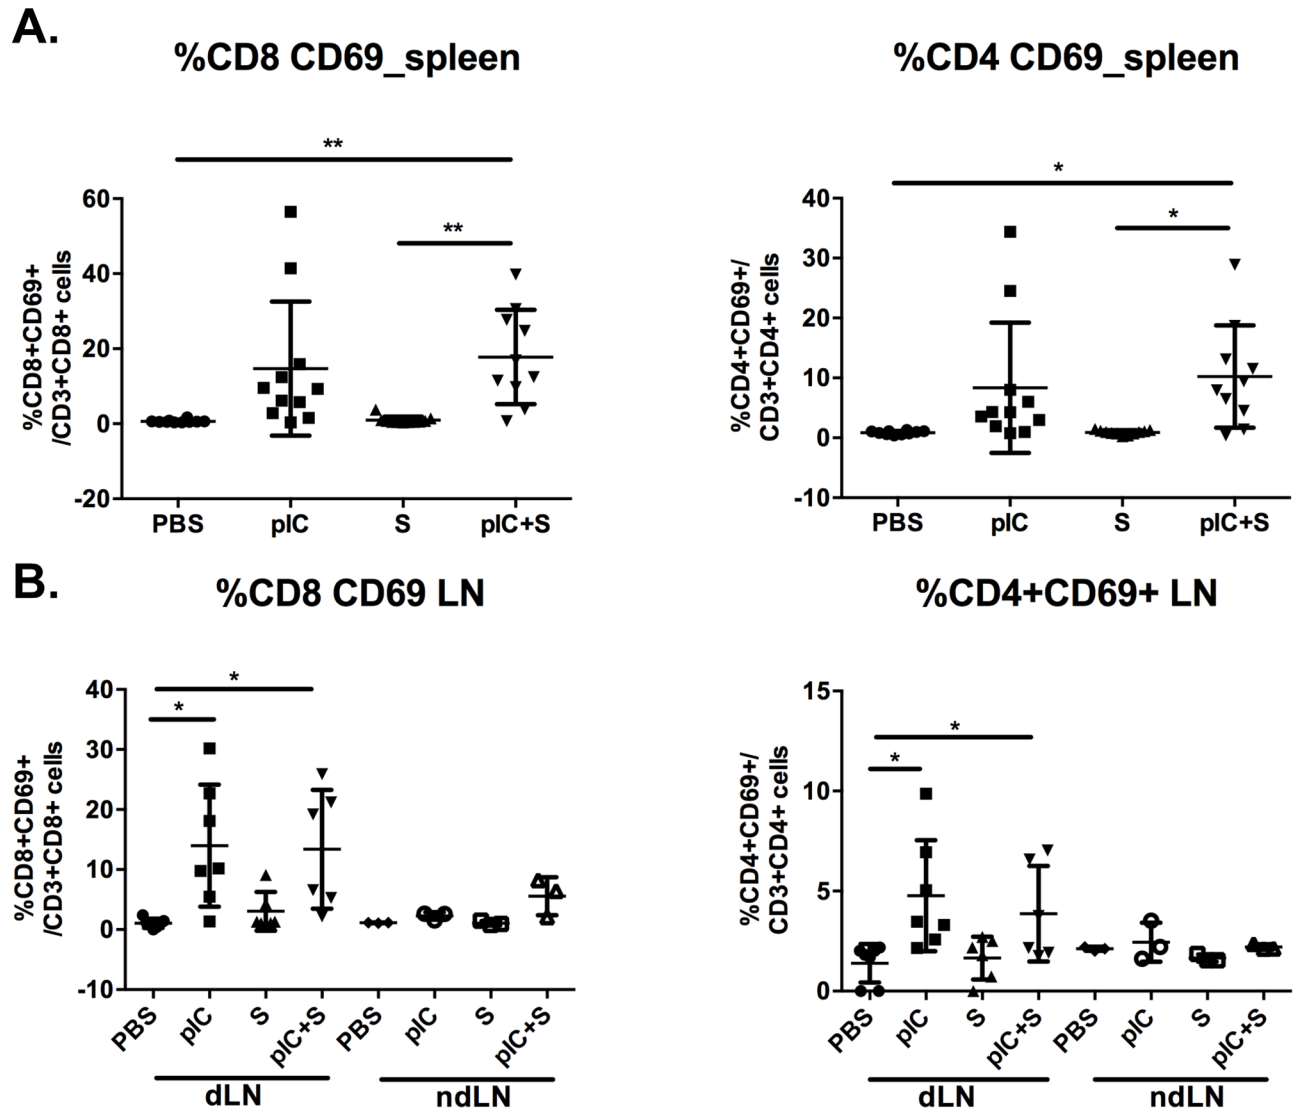

**Supplementary Figure S4: Enhanced activation of CD8<sup>+</sup> and CD4<sup>+</sup> T cells in the spleen and tumor-draining lymph-nodes with combinatorial treatment.** C57BL/6 mice were transplanted with Hepa 1-6 cells in each flank and treated with either PBS, poly-ICLC(pIC), Sorafenib (S) or combination of both (pIC+S) as indicated in Figure 2C. Immune cells were isolated from spleen,  $n = 10-11$ ; tumor draining inguinal and axillary lymph nodes (dLN),  $n = 6-7$ ; and non-tumor-draining submandibular (ndLN) and parotid lymph nodes,  $n = 3$  and analysed with flow cytometry. **A.** Increased percentage of CD69<sup>+</sup> on CD8<sup>+</sup> and CD4<sup>+</sup> T cells isolated from spleens in mice treated with pIC+S. **B.** Increased percentage of CD69<sup>+</sup> on CD8<sup>+</sup> and CD4<sup>+</sup> T cells isolated from tumor-draining inguinal and axillary lymph nodes relative to the non-draining submandibular and parotid lymph nodes in mice treated with pIC+S. A&B. Mean and SD were shown. \* $p < 0.05$ ; \*\* $p < 0.01$ , One-way ANOVA test with post Tukey's multiple comparisons test.



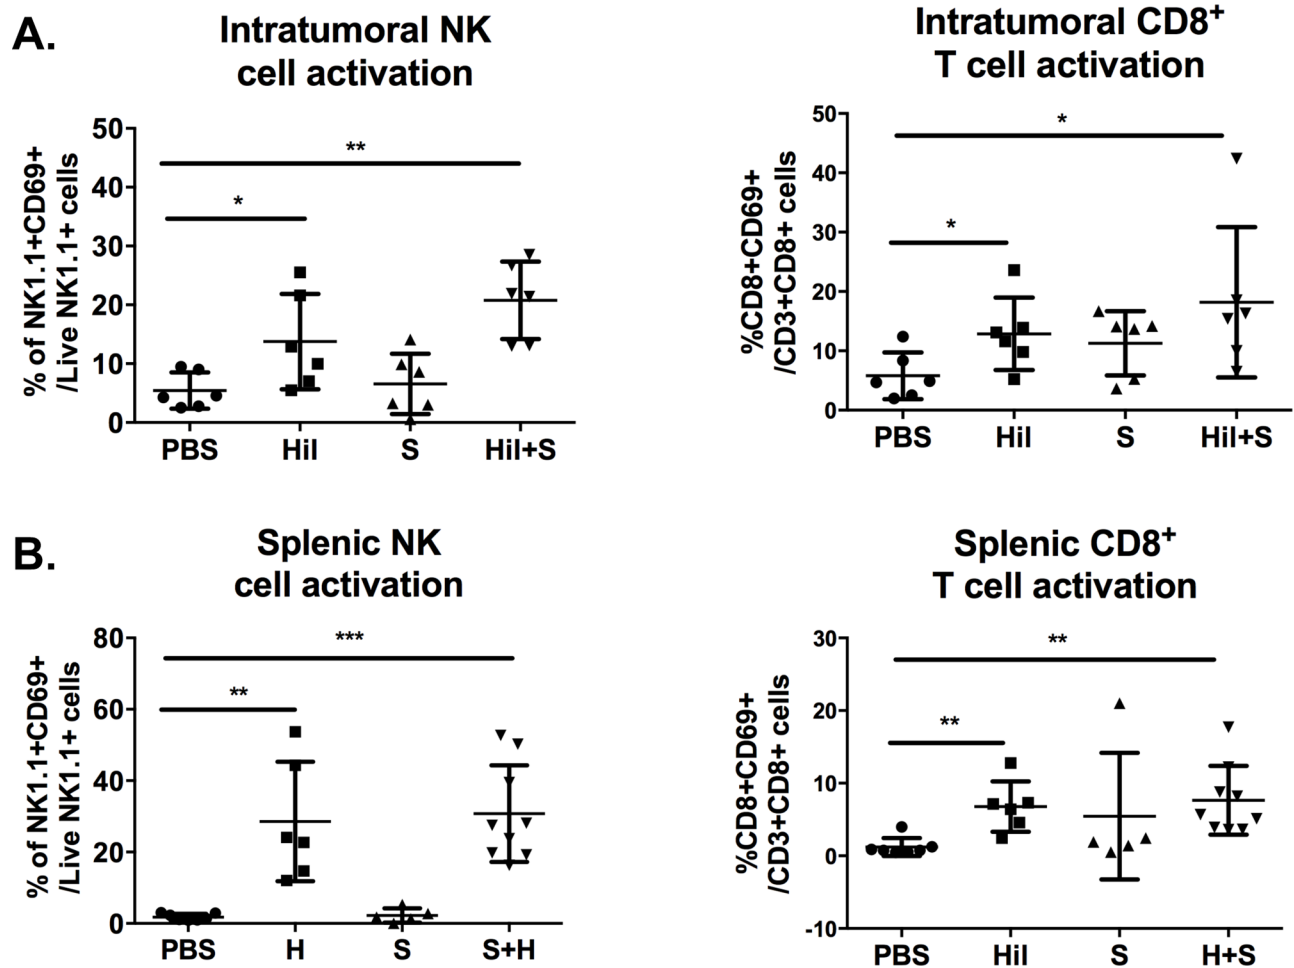

**Supplementary Figure S5: Enhanced activation of NK cells and CD8<sup>+</sup> T cells in the tumor and spleen with combinatorial treatment on spontaneous liver tumor model.** C57BL/6 mice were induced to develop liver tumors spontaneously and treated as indicated in Figure 1D. Immune cells were isolated from tumor  $n = 5-6$  or spleen,  $n = 5-9$  and analysed with flow cytometry. **A.** Increased percentage of CD69<sup>+</sup> on NK cells and CD8<sup>+</sup> T cells isolated from tumors in mice treated with pIC+S. **B.** Increased percentage of CD69<sup>+</sup> on NK cells and CD8<sup>+</sup> T cells isolated from spleens in mice treated with pIC+S. A&B. Mean and SD were shown. \* $p < 0.05$ ; \*\* $p < 0.01$ , \*\*\* $p < 0.0001$ ; One-way ANOVA test with post Tukey's multiple comparisons test.

A.

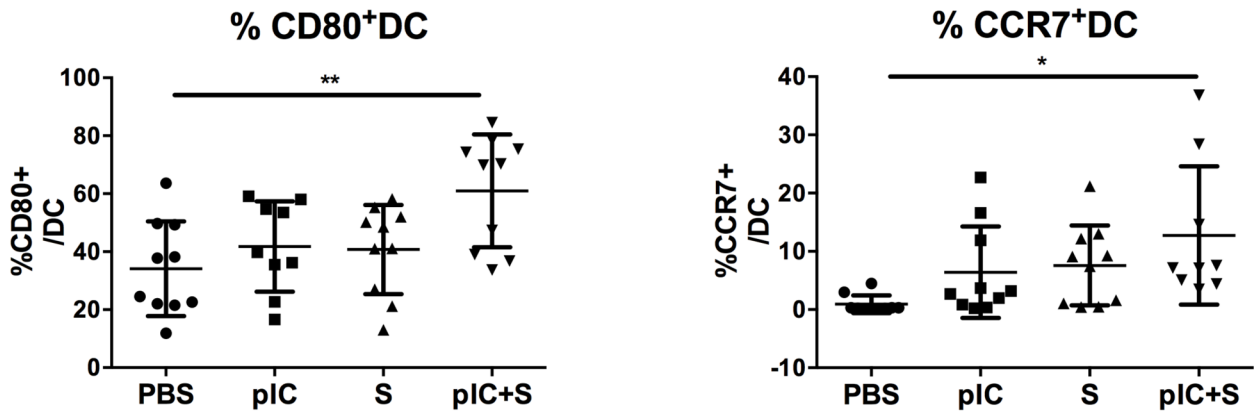

B.

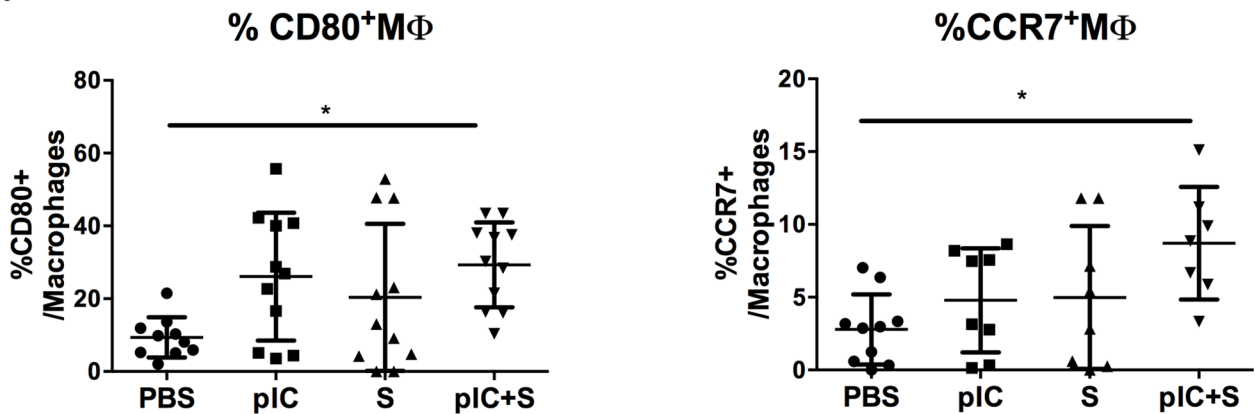

**Supplementary Figure S6: Enhanced activation of dendritic cells and macrophages with combinatorial treatment.** C57BL/6 mice were transplanted with Hepa 1-6 cells in each flank and treated with either PBS, poly-ICLC (pIC), Sorafenib (S) or combination of both (pIC+S) as indicated in Figure 2C. Tumor-infiltrating leukocytes (TIL) were isolated and analysed using flow cytometry. **A.** Increased percentage of CD80<sup>+</sup> and CCR7<sup>+</sup> dendritic cells (DC) in tumors from mice treated with pIC+S. **B.** Increased percentage of CD80<sup>+</sup> and CCR7<sup>+</sup> macrophages (MΦ) in tumors from mice treated with pIC+S. A&B.  $n = 8-10$ . Mean and SD were shown. \* $p < 0.05$ ; \*\* $p < 0.01$ , One-way ANOVA test with post Tukey's multiple comparisons test.
